# Supplementary material for: Flora and plant communities across a complex network of heavily modified water bodies: geographical patterns, land use and hydrochemical drivers in a temperate overexploited plain
Source: Springer Nature journal article supplement (doi:10.1007/s11355-022-00504-y), 2022-04-03
Supplement: MOESM1 [file 20279690]

**Flora and plant communities across a complex network of heavily modified water bodies:  
local geographical patterns, land use and hydrochemical drivers**

Irene Montanari(1)(2), Nicola De Bernardini(3), Gina Gizzi(1), Rossano Bolpagni(4)(5), Fabrizio Buldrini(1)\*, Louise Campione(1), Ilenia Castellari(1), Sara Landi(1)(5), Luigi Spiezia(1), Alessandro Chiarucci(1)

(1) BIOME Lab - Department of Biological, Geological and Environmental Science, University of Bologna. Via Irnerio 42, 40126 Bologna.

(2) Regional Agency for Prevention, Environment and Energy of Emilia-Romagna (Arpa Emilia-Romagna). Via Po 5, 40100 Bologna.

(3) Department of Biology, University of Padova. Via U. Bassi 58/b, 35121 Padova

(4) Department of Chemistry, Life Sciences and Environmental Sustainability, University of Parma. Viale delle Scienze 11/a, 43124 Parma.

(5) GREENARCO S.r.l., Spin-Off of the University of Bologna. Viale Giuseppe Fanin 48, 40127 Bologna.

\* Corresponding author: [fabrizio.buldrini@unibo.it](mailto:fabrizio.buldrini@unibo.it)

**Supplementary material 1** Land use categories cited in this study (classification follows Corine Land Cover IV)

| Acronym | Description                                               | Acronym | Description                                 |
|---------|-----------------------------------------------------------|---------|---------------------------------------------|
| Aa      | Aquaculture in the continental environment                | Ro      | Photovoltaic systems                        |
| Fs      | Airports for sports flights and heliports                 | It      | Technological systems                       |
| Cl      | Other wood crops                                          | Iz      | Agro-zootechnical settlements               |
| Av      | Riverbeds of rivers and streams with abundant vegetation  | Ic      | Commercial settlements                      |
| Af      | Riverbeds of rivers and streams with poor vegetation      | Is      | Service establishment                       |
| Ze      | Areas with important agricultural crops and natural areas | Io      | Hospital settlements                        |
| Qa      | Active extractive areas                                   | Ia      | Production sites                            |
| Qi      | Inactive extractive areas                                 | Vi      | Racecourses                                 |
| Vx      | Uncultivated urban areas                                  | Co      | Olive groves                                |
| Vs      | Sport areas                                               | Vp      | Parks                                       |
| Rv      | Green areas associated with roads                         | Vd      | Leisure parks                               |
| Ar      | Banks                                                     | Cp      | Poplar crops                                |
| Va      | Racetraks                                                 | Pp      | Meadows                                     |
| Ra      | Highways and expressways                                  | Rf      | Rail networks                               |
| Ax      | Artificial basins                                         | Re      | Energy distribution and production networks |
| Br      | Ruderal thickets                                          | Ri      | Networks for water distribution             |
| Bq      | Oak, hornbeam and chestnut forests                        | Rs      | Road networks                               |
| Bs      | Predominantly willow and poplar forests                   | Ta      | Recent reforestation                        |
| Bm      | Mixed coniferous and broad-leaved forests                 | Sn      | Non-irrigated arable land                   |
| Bp      | Plain forests with a prevalence of farnies and ash trees  | Se      | Irrigated plain arable land                 |
| Vt      | Camping and tourist accommodation                         | Zo      | Complex crop and particle systems           |
| Vg      | Golf courses                                              | Es      | Isolated residential facilities             |
| Ac      | Canals and waterways                                      | Qs      | Modified soils and artifacts                |
| Qc      | Construction sites and excavations                        | Er      | Sparse residential fabric                   |
| Vm      | Cemeteries                                                | Ec      | Compact and dense residential fabric        |
| So      | Horticultural crops                                       | Ed      | Urban residential fabric                    |
| Zt      | Temporary crops combined with permanent crops             | Tn      | Evolving shrubby and arboreal vegetation    |
| Qr      | Salvage yards                                             | Cv      | Vineyards                                   |
| Qu      | Landfill of municipal solid waste                         | Vv      | Villas                                      |
| Qq      | Landfills and deposits of quarries, mines & industries    | Sv      | Nurseries                                   |
| Cf      | Fruit trees                                               | Ui      | Inland wetlands                             |
| Rm      | Marshalling yards                                         |         |                                             |
