# Supplementary material for: Flora and plant communities across a complex network of heavily modified water bodies: geographical patterns, land use and hydrochemical drivers in a temperate overexploited plain
Source: Springer Nature journal article supplement (doi:10.1007/s11355-022-00504-y), 2022-04-03
Supplement: MOESM2 [file 20279690]

**Flora and plant communities across a complex network of heavily modified water bodies:  
local geographical patterns, land use and hydrochemical drivers**

Irene Montanari(1)(2), Nicola De Bernardini(3), Gina Gizzi(1), Rossano Bolpagni(4)(5), Fabrizio Buldrini(1)\*, Louise Campione(1), Ilenia Castellari(1), Sara Landi(1)(5), Luigi Spiezia(1), Alessandro Chiarucci(1)

(1) BIOME Lab - Department of Biological, Geological and Environmental Science, University of Bologna. Via Irnerio 42, 40126 Bologna.

(2) Regional Agency for Prevention, Environment and Energy of Emilia-Romagna (Arpa Emilia-Romagna). Via Po 5, 40100 Bologna.

(3) Department of Biology, University of Padova. Via U. Bassi 58/b, 35121 Padova

(4) Department of Chemistry, Life Sciences and Environmental Sustainability, University of Parma. Viale delle Scienze 11/a, 43124 Parma.

(5) GREENARCO S.r.l., Spin-Off of the University of Bologna. Viale Giuseppe Fanin 48, 40127 Bologna.

\* Corresponding author: [fabrizio.buldrini@unibo.it](mailto:fabrizio.buldrini@unibo.it)

**Supplementary material 2** Slope (in percentage) of each stretch of canal where we sampled vegetation (L = large canals, M = medium canals, S = small canals, H2O = canals for which both vegetation and water quality data are available)

| Transect | Canal type | Slope % | Transect | Canal type | Slope % | Transect | Canal type | Slope % |
|----------|------------|---------|----------|------------|---------|----------|------------|---------|
| AG_01    | L          | 0.15    | FM_01    | M          | 0.10    | GMA_01   | S          | 0.05    |
| AIV_04   | L          | 0.05    | FRB_01   | M          | 0.05    | GO_01    | S          | 0.45    |
| AIV_05   | L          | 0.05    | FS_01    | M          | 0.20    | GSA_01   | S          | 0.10    |
| AIV_06   | L          | 0.15    | GA_01    | M          | 0.00    | GZ_01    | S          | 0.10    |
| BG_01    | L          | 0.00    | GF_01    | M          | 0.10    | LA_01    | S          | 0.25    |
| BG_03    | L          | 0.40    | GI_01    | M          | 0.05    | LM_01    | S          | 0.15    |
| CB_02    | L          | 0.00    | GT_01    | M          | 0.05    | MA_01    | S          | 0.00    |
| CZ_01    | L          | 0.05    | ID_01    | M          | 0.40    | MT_01    | S          | 0.10    |
| DO_01    | L          | 0.00    | LD_01    | M          | 0.50    | OI_01    | S          | 0.00    |
| FD_01    | L          | 0.10    | MA_02    | M          | 0.00    | OR_01    | S          | 0.10    |
| GL_01    | L          | 0.30    | MO_02    | M          | 0.05    | PD_01    | S          | 0.20    |
| GR_02    | L          | 0.05    | MU_01    | M          | 0.20    | SCA_01   | S          | 0.10    |
| GR_03    | L          | 0.15    | PR_01    | M          | 0.00    | SG_01    | S          | 0.35    |
| LD_02    | L          | 0.15    | QU_01    | M          | 0.00    | SI_01    | S          | 0.05    |
| MO_01    | L          | 0.05    | RA_01    | M          | 0.20    | SN_01    | S          | 0.10    |
| RI_01    | L          | 0.10    | RC_01    | M          | 0.05    | ST_01    | S          | 0.15    |
| RI_02    | L          | 0.10    | RD_01    | M          | 0.00    | AIV_03   | H2O        | 0.10    |
| SB_04    | L          | 0.10    | RM_01    | M          | 0.35    | BG_02    | H2O        | 0.00    |
| SC_01    | L          | 0.25    | SAB_01   | M          | 0.10    | CB_01    | H2O        | 0.05    |
| SLI_01   | L          | 0.05    | SCS_01   | M          | 0.25    | CL_01    | H2O        | 0.05    |
| SM_01    | L          | 0.05    | SGB_01   | M          | 0.20    | CV_03    | H2O        | 0.05    |
| ZQ_01    | L          | 0.20    | SI_02    | M          | 0.05    | DD_01    | H2O        | 0.25    |
| ZS_01    | L          | 0.20    | SLS_01   | M          | 0.10    | GR_01    | H2O        | 0.20    |
| BA_01    | M          | 0.05    | SLS_02   | M          | 0.05    | IF_01    | H2O        | 0.10    |
| BD_01    | M          | 0.05    | SS_01    | M          | 0.05    | LG_01    | H2O        | 0.10    |
| BI_01    | M          | 0.10    | TG_01    | M          | 0.20    | NA_01    | H2O        | 0.10    |
| BR_01    | M          | 0.10    | TR_01    | M          | 0.00    | NA_02    | H2O        | 0.10    |
| CA_01    | M          | 0.05    | VA_01    | M          | 0.05    | NA_03    | H2O        | 0.05    |
| CB_03    | M          | 0.05    | ZI_04    | M          | 0.10    | RI_03    | H2O        | 0.10    |
| CGB_01   | M          | 0.05    | AN_01    | S          | 0.15    | RR_01    | H2O        | 0.75    |
| CMN_01   | M          | 0.05    | BN_01    | S          | 0.40    | SA_03    | H2O        | 0.10    |
| CR_01    | M          | 0.15    | CF_01    | S          | 0.10    | SAM_01   | H2O        | 0.05    |
| CT_01    | M          | 0.25    | CM_01    | S          | 0.20    | SAV_01   | H2O        | 0.00    |
| CTA_01   | M          | 0.30    | CMT_01   | S          | 0.05    | SB_03    | H2O        | 0.10    |
| FC_01    | M          | 0.10    | CO_01    | S          | 0.05    | SL_01    | H2O        | 0.25    |
| FCN_01   | M          | 0.05    | DC_01    | S          | 0.10    | SQ_03    | H2O        | 0.00    |
| FCN_02   | M          | 0.00    | GM_01    | S          | 0.05    | STB_01   | H2O        | 0.05    |
| FD_02    | M          | 0.30    | GM_02    | S          | 0.10    | ZI_03    | H2O        | 0.05    |
| FD_03    | M          | 0.30    | GM_03    | S          | 0.15    |          |            |         |
| FG_01    | M          | 0.30    | GM_04    | S          | 0.25    |          |            |         |
