# Supplementary material for: Flora and plant communities across a complex network of heavily modified water bodies: geographical patterns, land use and hydrochemical drivers in a temperate overexploited plain
Source: Springer Nature journal article supplement (doi:10.1007/s11355-022-00504-y), 2022-04-03
Supplement: MOESM3 [file 20279690]

**Flora and plant communities across a complex network of heavily modified water bodies: local geographical patterns, land use and hydrochemical drivers**

Irene Montanari(1)(2), Nicola De Bernardini(3), Gina Gizzi(1), Rossano Bolpagni(4)(5), Fabrizio Buldrini(1)\*, Louise Campione(1), Ilenia Castellari(1), Sara Landi(1)(5), Luigi Spiezia(1), Alessandro Chiarucci(1)

(1) BIOME Lab - Department of Biological, Geological and Environmental Science, University of Bologna. Via Irnerio 42, 40126 Bologna.

(2) Regional Agency for Prevention, Environment and Energy of Emilia-Romagna (Arpa Emilia-Romagna). Via Po 5, 40100 Bologna.

(3) Department of Biology, University of Padova. Via U. Bassi 58/b, 35121 Padova

(4) Department of Chemistry, Life Sciences and Environmental Sustainability, University of Parma. Viale delle Scienze 11/a, 43124 Parma.

(5) GREENARCO S.r.l., Spin-Off of the University of Bologna. Viale Giuseppe Fanin 48, 40127 Bologna.

\* Corresponding author: [fabrizio.buldrini@unibo.it](mailto:fabrizio.buldrini@unibo.it)

**Supplementary material 3** Average slope for each type of canal (L = large canals, M = medium canals, S = small canals, H2O = canals for which both vegetation and water quality data are available)

| <b>Canal type</b> | <b>Average slope (%)</b> | <b>Standard deviation (<math>\sigma</math>)</b> |
|-------------------|--------------------------|-------------------------------------------------|
| L                 | 0,12                     | 0,10                                            |
| M                 | 0,12                     | 0,12                                            |
| S                 | 0,14                     | 0,11                                            |
| H2O               | 0,12                     | 0,16                                            |
