# Supplementary material for: Flora and plant communities across a complex network of heavily modified water bodies: geographical patterns, land use and hydrochemical drivers in a temperate overexploited plain
Source: Springer Nature journal article supplement (doi:10.1007/s11355-022-00504-y), 2022-04-03
Supplement: MOESM4 [file 20279690]

## **Flora and plant communities across a complex network of heavily modified water bodies: local geographical patterns, land use and hydrochemical drivers**

Irene Montanari(1)(2), Nicola De Bernardini(3), Gina Gizzi(1), Rossano Bolpagni(4)(5), Fabrizio Buldrini(1)\*, Louise Campione(1), Ilenia Castellari(1), Sara Landi(1)(5), Luigi Spiezia(1), Alessandro Chiarucci(1)

(1) BIOME Lab - Department of Biological, Geological and Environmental Science, University of Bologna. Via Irnerio 42, 40126 Bologna.

(2) Regional Agency for Prevention, Environment and Energy of Emilia-Romagna (Arpa Emilia-Romagna). Via Po 5, 40100 Bologna.

(3) Department of Biology, University of Padova. Via U. Bassi 58/b, 35121 Padova

(4) Department of Chemistry, Life Sciences and Environmental Sustainability, University of Parma. Viale delle Scienze 11/a, 43124 Parma.

(5) GREENARCO S.r.l., Spin-Off of the University of Bologna. Viale Giuseppe Fanin 48, 40127 Bologna.

\* Corresponding author: [fabrizio.buldrini@unibo.it](mailto:fabrizio.buldrini@unibo.it)

**Supplementary material 4** Percentage of land use classes in the upstream basin of each type of sampled canal (L = large canals, M = medium canals, S = small canals, H2O = canals for which both vegetation and water quality data are available)

| Land use classes                                          | Acronym | Canal type |     |     |     |
|-----------------------------------------------------------|---------|------------|-----|-----|-----|
|                                                           |         | H2O        | L   | M   | S   |
| Aquaculture in the continental environment                | Aa      | 0,1        | 0,4 | 0,0 | 0,0 |
| Airports for sports flights and heliports                 | Fs      | 0,1        | 0,1 | 0,1 | 0,0 |
| Other wood crops                                          | Cl      | 0,2        | 0,1 | 0,2 | 0,1 |
| Riverbeds of rivers and streams with abundant vegetation  | Av      | 0,0        | 0,0 | 0,1 | 0,2 |
| Riverbeds of rivers and streams with poor vegetation      | Af      | 0,1        | 0,0 | 0,3 | 0,2 |
| Areas with important agricultural crops and natural areas | Ze      | 0,0        | 0,0 | 0,0 | 0,0 |
| Active extractive areas                                   | Qa      | 0,0        | 0,0 | 0,0 | 0,2 |
| Inactive extractive areas                                 | Qi      | 0,0        | 0,0 | 0,0 | 1,0 |
| Uncultivated urban areas                                  | Vx      | 0,2        | 0,6 | 0,5 | 0,3 |
| Sport areas                                               | Vs      | 0,1        | 0,3 | 0,3 | 0,4 |
| Green areas associated with roads                         | Rv      | 0,1        | 0,5 | 0,2 | 0,3 |
| Banks                                                     | Ar      | 0,5        | 0,2 | 0,2 | 0,0 |
| Racetraks                                                 | Va      | 0,0        | 0,0 | 0,0 | 0,0 |
| Highways and expressways                                  | Ra      | 0,0        | 0,3 | 0,1 | 0,4 |
| Artificial basins                                         | Ax      | 0,4        | 0,4 | 0,5 | 0,5 |
| Ruderal thickets                                          | Br      | 0,0        | 0,1 | 0,1 | 0,1 |
| Oak, hornbeam and chestnut forests                        | Bq      | 0,4        | 0,0 | 1,2 | 0,0 |
| Predominantly willow and poplar forests                   | Bs      | 0,2        | 0,0 | 0,0 | 0,1 |
| Mixed coniferous and broad-leaved forests                 | Bm      | 0,0        | 0,0 | 0,0 | 0,0 |
| Plain forests with a prevalence of farnies and ash trees  | Bp      | 0,1        | 0,2 | 0,0 | 0,2 |
| Camping and tourist accommodation                         | Vt      | 0,0        | 0,0 | 0,0 | 0,0 |
| Golf courses                                              | Vg      | 0,0        | 0,0 | 0,0 | 0,0 |
| Canals and waterways                                      | Ac      | 2,5        | 1,5 | 0,5 | 1,1 |
| Construction sites and excavations                        | Qc      | 0,1        | 0,5 | 0,3 | 0,6 |
| Cemeteries                                                | Vm      | 0,0        | 0,1 | 0,1 | 0,1 |
| Horticultural crops                                       | So      | 0,1        | 0,3 | 0,3 | 0,2 |
| Temporary crops combined with permanent crops             | Zt      | 0,2        | 0,1 | 0,1 | 0,1 |
| Salvage yards                                             | Qr      | 0,0        | 0,0 | 0,1 | 0,0 |
| Landfill of municipal solid waste                         | Qu      | 0,1        | 0,0 | 0,2 | 0,0 |
| Landfills and deposits of quarries, mines & industries    | Qq      | 0,0        | 0,0 | 0,0 | 0,0 |
| Fruit trees                                               | Cf      | 4,2        | 2,9 | 3,3 | 4,2 |
| Marshalling yards                                         | Rm      | 0,0        | 0,8 | 0,0 | 0,0 |
| Photovoltaic systems                                      | Ro      | 0,1        | 0,2 | 0,1 | 0,1 |
| Technological systems                                     | It      | 0,0        | 0,0 | 0,0 | 0,0 |
| Agro-zootechnical settlements                             | Iz      | 0,6        | 0,7 | 0,7 | 0,5 |
| Commercial settlements                                    | Ic      | 0,0        | 0,1 | 0,1 | 0,1 |
| Service establishment                                     | Is      | 0,2        | 0,5 | 0,4 | 0,2 |
| Hospital settlements                                      | Io      | 0,0        | 0,0 | 0,0 | 0,0 |
| Production sites                                          | Ia      | 1,0        | 2,9 | 2,1 | 1,0 |

|                                             |    |      |      |      |      |
|---------------------------------------------|----|------|------|------|------|
| Racecourses                                 | Vi | 0,1  | 0,4  | 0,1  | 0,1  |
| Olive groves                                | Co | 0,1  | 0,0  | 0,0  | 0,0  |
| Parks                                       | Vp | 0,2  | 0,3  | 0,3  | 0,5  |
| Leisure parks                               | Vd | 0,0  | 0,0  | 0,0  | 0,0  |
| Poplar crops                                | Cp | 0,4  | 0,1  | 0,3  | 0,4  |
| Meadows                                     | Pp | 0,3  | 0,3  | 0,4  | 0,5  |
| Rail networks                               | Rf | 0,1  | 0,4  | 0,3  | 0,2  |
| Energy distribution and production networks | Re | 0,1  | 0,1  | 0,2  | 0,1  |
| Networks for water distribution             | Ri | 0,0  | 0,0  | 0,0  | 0,0  |
| Road networks                               | Rs | 0,8  | 2,0  | 1,4  | 1,4  |
| Recent reforestation                        | Ta | 1,4  | 0,8  | 0,4  | 0,2  |
| Non-irrigated arable land                   | Sn | 0,5  | 0,0  | 1,6  | 0,0  |
| Irrigated plain arable land                 | Se | 74,6 | 69,5 | 70,3 | 75,2 |
| Complex crop and particle systems           | Zo | 0,1  | 0,1  | 0,2  | 0,4  |
| Isolated residential facilities             | Es | 2,3  | 3,5  | 4,2  | 4,7  |
| Modified soils and artifacts                | Qs | 0,3  | 0,4  | 0,2  | 0,3  |
| Sparse residential fabric                   | Er | 1,3  | 2,0  | 1,9  | 1,0  |
| Compact and dense residential fabric        | Ec | 0,0  | 0,0  | 0,0  | 0,0  |
| Urban residential fabric                    | Ed | 0,4  | 0,8  | 0,8  | 0,5  |
| Evolving shrubby and arboreal vegetation    | Tn | 0,4  | 0,4  | 0,9  | 0,3  |
| Vineyards                                   | Cv | 0,3  | 1,4  | 1,9  | 0,5  |
| Villas                                      | Vv | 0,2  | 0,6  | 0,5  | 1,0  |
| Nurseries                                   | Sv | 0,1  | 0,6  | 0,1  | 0,3  |
| Inland wetlands                             | Ui | 4,3  | 2,6  | 1,8  | 0,1  |
