# Supplementary material for: Flora and plant communities across a complex network of heavily modified water bodies: geographical patterns, land use and hydrochemical drivers in a temperate overexploited plain
Source: Springer Nature journal article supplement (doi:10.1007/s11355-022-00504-y), 2022-04-03

**Flora and plant communities across a complex network of heavily modified water bodies: local geographical patterns, land use and hydrochemical drivers**

Irene Montanari(1)(2), Nicola De Bernardini(3), Gina Gizzi(1), Rossano Bolpagni(4)(5), Fabrizio Buldrini(1)\*, Louise Campione(1), Ilenia Castellari(1), Sara Landi(1)(5), Luigi Spiezia(1), Alessandro Chiarucci(1)

(1) BIOME Lab - Department of Biological, Geological and Environmental Science, University of Bologna. Via Irnerio 42, 40126 Bologna.

(2) Regional Agency for Prevention, Environment and Energy of Emilia-Romagna (Arpa Emilia-Romagna). Via Po 5, 40100 Bologna.

(3) Department of Biology, University of Padova. Via U. Bassi 58/b, 35121 Padova

(4) Department of Chemistry, Life Sciences and Environmental Sustainability, University of Parma. Viale delle Scienze 11/a, 43124 Parma.

(5) GREENARCO S.r.l., Spin-Off of the University of Bologna. Viale Giuseppe Fanin 48, 40127 Bologna.

\* Corresponding author: [fabrizio.buldrini@unibo.it](mailto:fabrizio.buldrini@unibo.it)

**Supplementary material 5** Non-metric multidimensional scaling plot in which each point represents a transect with alien, invasive or threatened species (stress = 0.001); Jaccard's method was applied. In this analysis we did not consider the other species to highlight the influence of these three categories

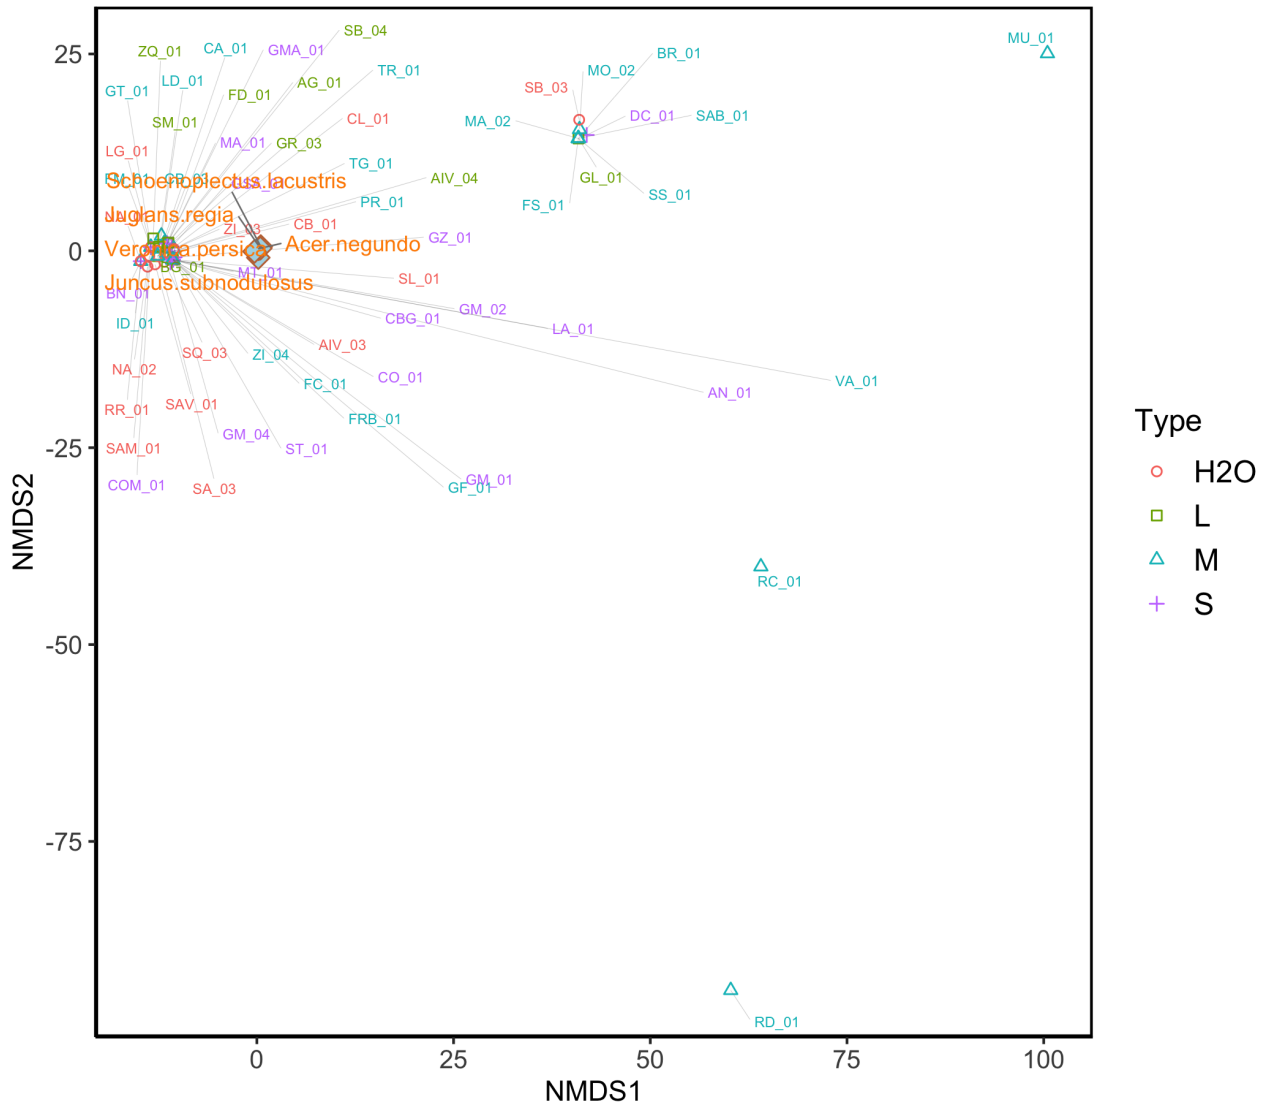

Supplement: MOESM5 [file 20279690]
